# Supplementary material
Source: PubMed Central journal article supplement (PMC5996696)
Supplement: JB.00076-18_zjb013184793s1.pdf [file JB.00076-18_zjb013184793s1.pdf]

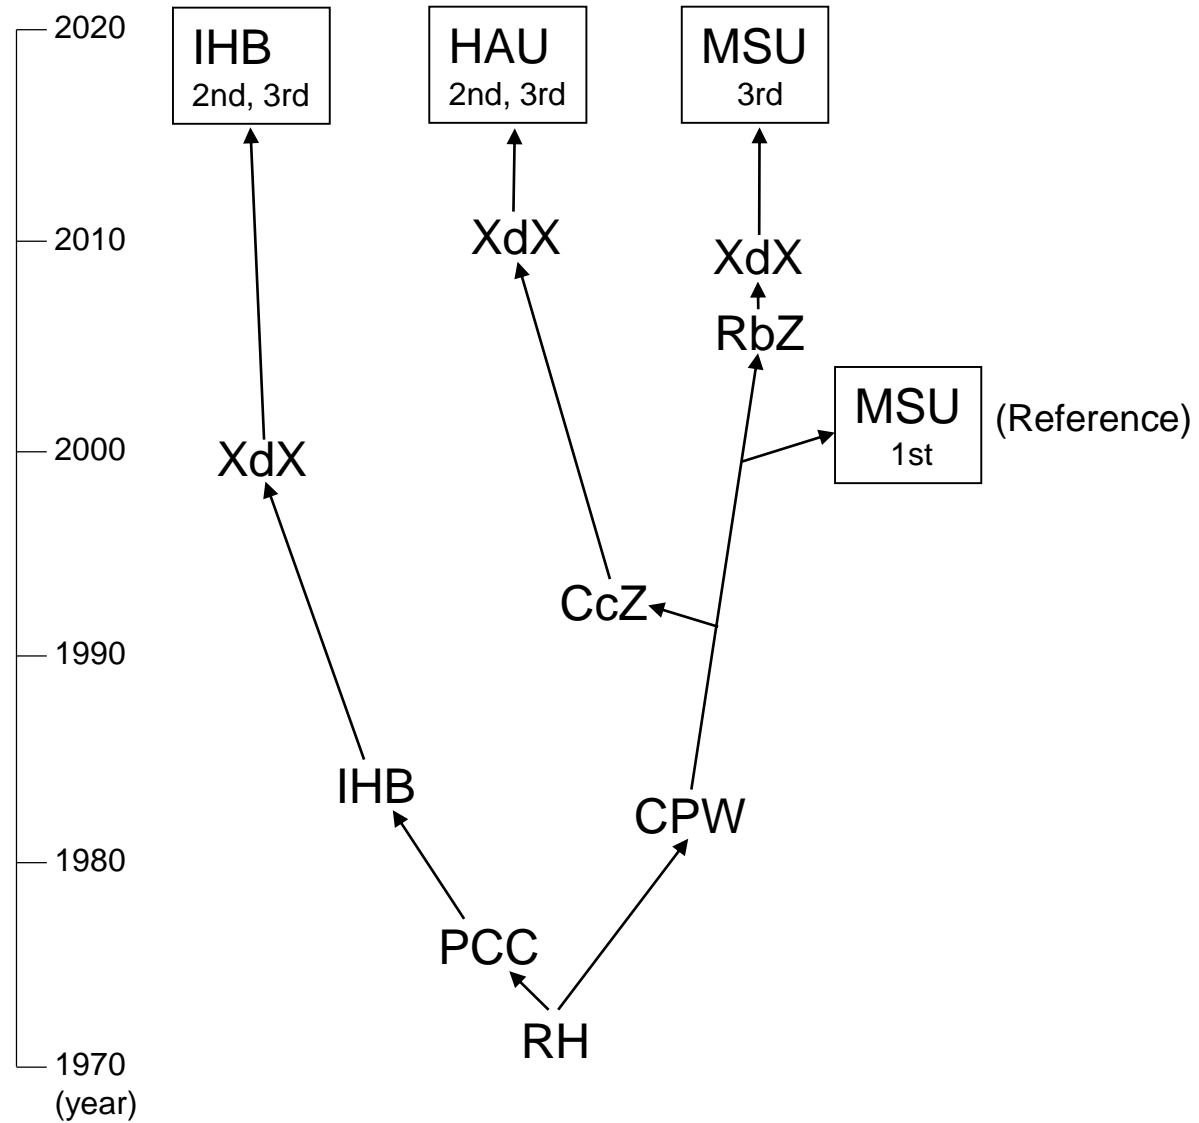

FIG S1 A brief history of *Anabaena* 7120 substrains used in this study. CPW, C. Peter Wolk; CcZ, Chengcai Zhang; HAU, Huazhong Agriculture University; IHB, Institute of Hydrobiology; MSU, Michigan State University; RH, Robert Haselkorn; RbZ, Ruanbao Zhou; XuX, Xudong Xu. 1st, 2nd and 3rd stand for different generation sequencing data.

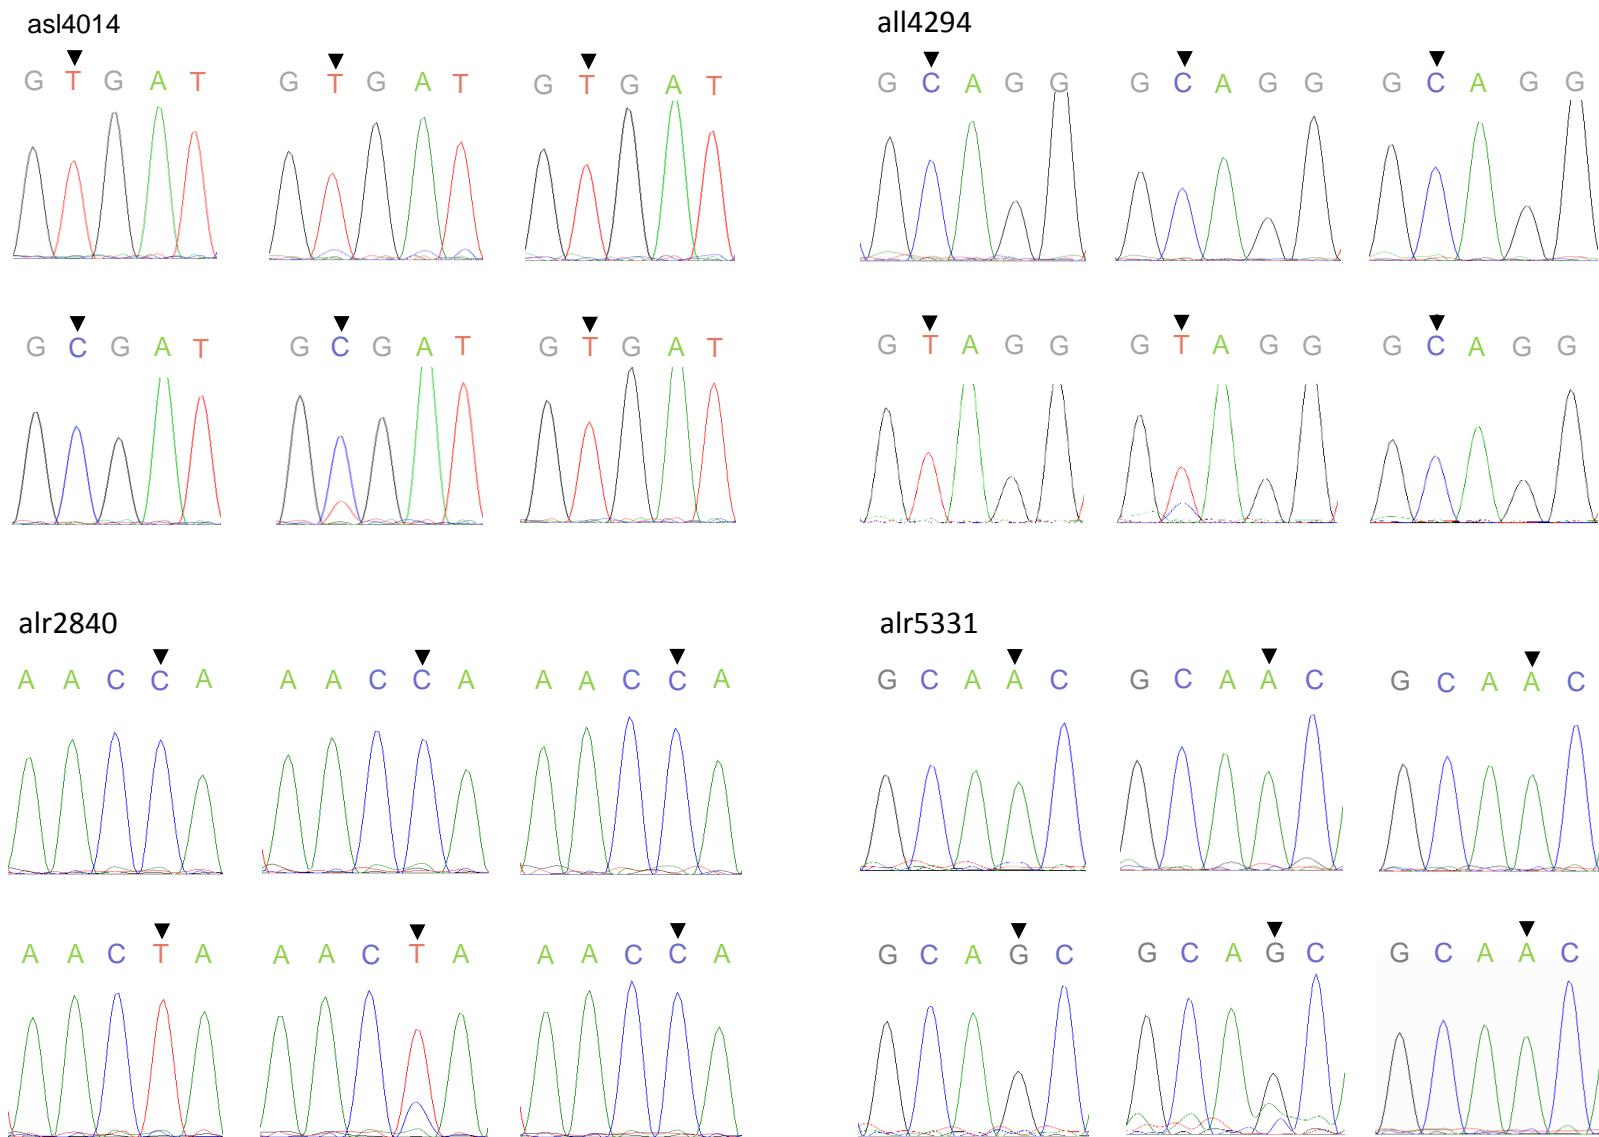

FIG S2 Ongoing substitutions in *Anabaena* PCC 7120 IHB. Filaments of the substrain were plated after sonication and dilution, 6 colonies were randomly picked and cultured. PCR products were generated with DNA of the 6 colonies and sequenced. Arrowheads point to bases being substituted in the population.

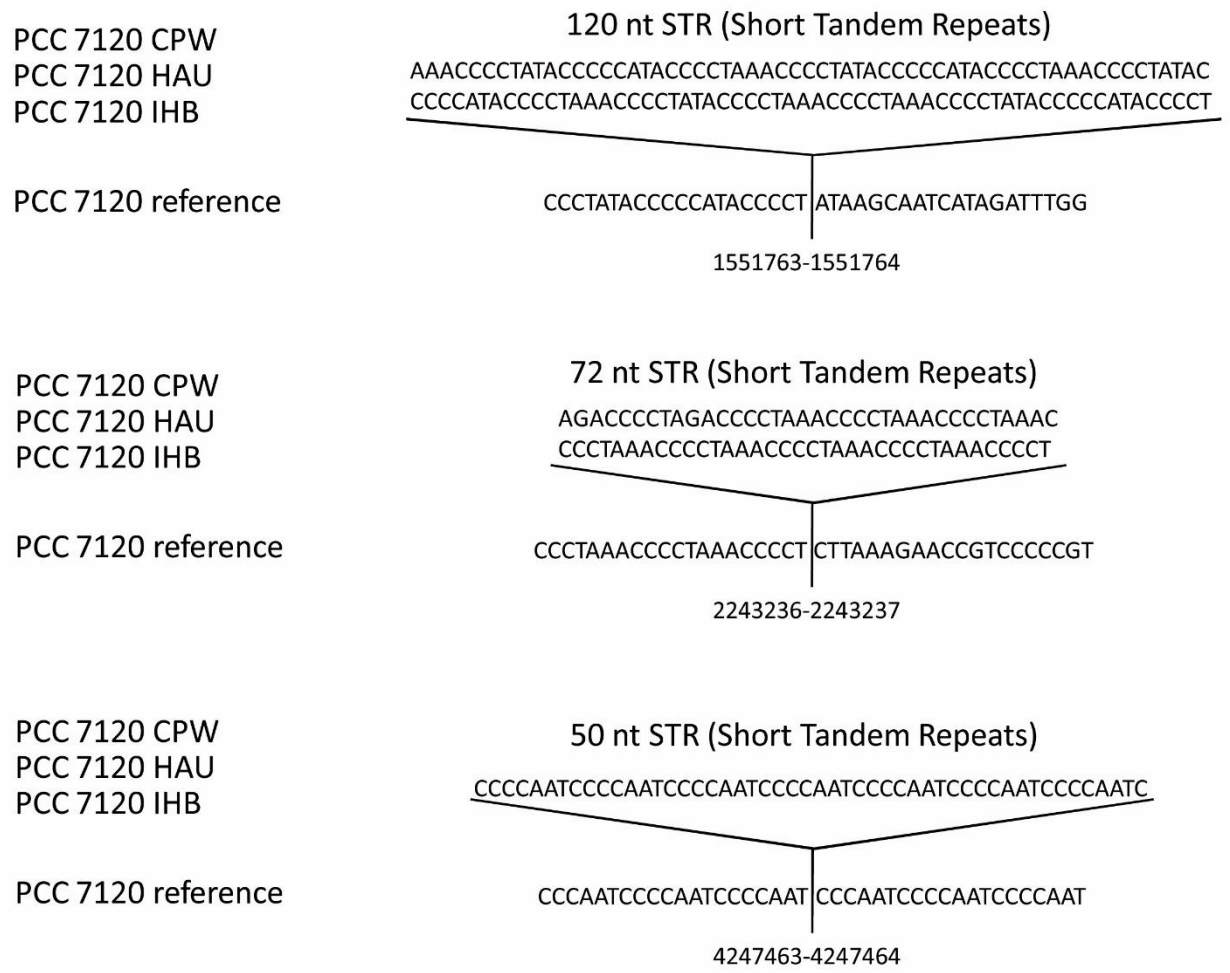

FIG S3 Three short sequence stretches that are missing in the PCC 7120 reference sequence in the Cyanobase.

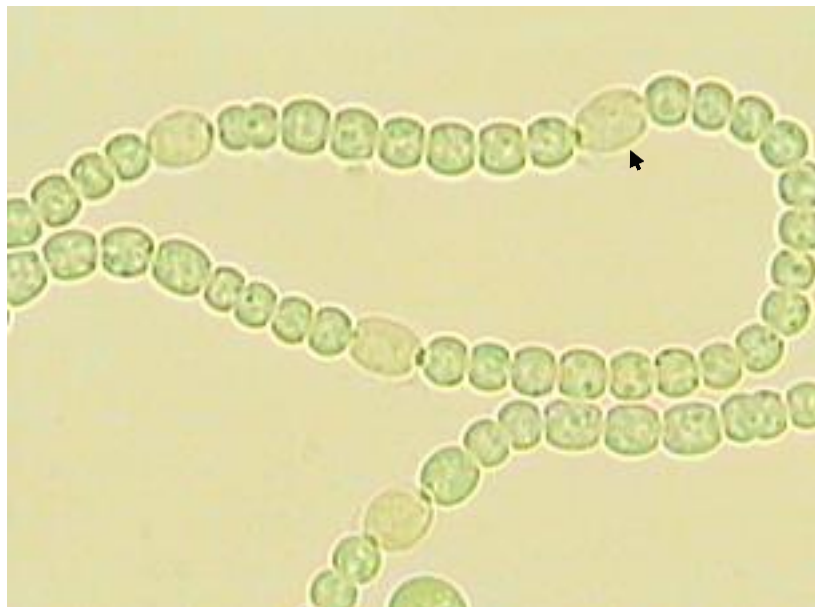

FIG S4 Complementation of *Anabaena* 7120-MSU *hetC*::C.CE2 with pHB3589 that carries *hetC*. The photomicrograph was taken at 24 h after N-stepdown. The arrowhead points to a heterocyst.

FIG S5 Proposed sequence of the extra IS(*all7245*, *asl7246*) at the alpha plasmid position 165178 in HAU and IHB (Fig. 2B). The short highlighted sequence (yellow) at the 3' end is not found at the end of the copy at alpha plasmid position 45585 in IHB (Fig. 2B) and the end of the copy at alpha 267900-266184 in HAU, IHB and MSU [where *all7245* and *asl7246* are located; not shown in Fig. 2B]. Start and stop codons for *all7245* and *asl7246* are indicated in red and boxed.

(5' > 3')

TTTCTGCAAGCCGCACACTCGTGACTTCTAGTCATGAGTTAGGCGCTCCATATTTCCATA  
TTTTGTCTTACTATGGTCATGCACATGGTAAGATGAATTATGGAAGTAAAGCACGGTAG  
AGTTACGTTTATGCAATTGAGTATCATATCGTATGGTGTGTTAAGTATAGGCATAAGGT  
ACTGAAAGATGAAATAGCTGACTTTCTGAAAGAAGTTCTAGTTGAGACGGCAATTCTT  
TACAAATTCAAGGTTGAGAGTCTTGAGGTAGTAGAAGACCATGTTTCATGTTTTAATGTGTC  
TGCAACGCCTCAGCACACCATCCCTAATATAGTCAAAATGCTAAAGGGAATATCAGCTA  
GGAAATTGTTTTTAAAGTTTCCTCAACTCAAGAAAAAGCTATGGGGAGGTCATCTCTG  
GAATCCTAGTTATTTTGTAAGTACTGTTTCAGATAATACAGAAGCACAAGTCAAAAAGT  
ACATAGAAAACCAAATATGTCAGAGAGCGTTTAAAGTTTAACTCATTCCCTAATCACAATC  
AAGAGGTCTTAATCAATAAGAGTATTGGTTGTGCAAGGTTTGTGTATAACCACTTTCTG  
GCATTAAGCAAGAGCTATATCAGTCCGAACAGAAAACATTAACCTATAACGCTTGTAG  
TCAACGTTTAACTTTACTCAAGAAAGAAATTGAATGGTTGAAGGAAGTAGATAAGTTT  
GCCTTACAGAATTCGCTCAAGAATTTAGAGACAGCATACAAAAACTTTTTTGCTGACTT  
AAAGAAGGTCAAAGGCAAAAAGGAGTAGGCTTTCCCAAGTTTAAAAGAAGCATGG  
TTGCAAGCAGTCTTACAAGACGAATTTAACAACGGTAACATCCAGGTAATAGAGAAT  
CGTTTAAAGCTTCCGAAGTTAGGGTGGGTGAAGTTTCATAAGTCCCAAGAAGTTACCG  
GAAAGCTTATAACGTTACCATAACTCGGACTTCTTCTGGTAAATATGTTGCTAGTATTC  
TGTGTGATACAGAGATTGAGAAACATCCCAAGTTAGTCAAAATATTGGCATAGACTTA  
GGCATAAAGTCTTATCTCGTTACTAGTAATGGGGAAGTCGTAGATAATCCCAAATATTAC  
CGGACTCAAACCTCGTAAATTACGTAAAGCACATAAAAAATTATCCCGCAGTGTAAGG  
GCAGTACTAATCGAGTCAAAGCGAAAATCAAGCTGGCTCGTAGCTACGAAAGAATTAC  
CAATCTCAGAGATGACTTTCTGCACAAGCTGTCAACTCGTCTAATCAAAGAAAACAGT

ATTATCTGTATTGAGGATTTGCGAGTTGCCAACATGGTAAAAAACATAAATTATCATTG  
AGTATTTTCAGACGCTAGTTGGTCTAAGTTCGTTGCCATGCTTGAATATAAAGCTTTTTGG  
CATGACAGAATTGTGCAGAAGGTTGGTACGTTTTATCCCTCCTCTCAGACTTGTAATCA  
TTGTGGTTTTATCAACCCTTTGGTCAAAGATTTAAAGTTACGTGAATGGGCTTGTCTG  
GTTGTAGTGGTTACAATTTGAGAGACAATAACGCAGCGTTGAACATATTAGGTGAGGGA  
TTGAGATTAATAGCCGCCGTGGGTATCCCGGAGGCTCTAAACGCCTGTGGAGAACTCG  
TCAGTCCTGGAGCAATTCAGGCAGAGATCGTTGAAGCAGGAATCACGCGACTTCAAGT  
CGTG TGA GGTTCAA GATAGAATCAGCTAAATCTTGA

**Table S1 Chromosomal SNPs in *Anabaena* sp. PCC 7120 substrains IHB and HAU\***

| Position | Ref.<br>base | IHB  |       | HAU  |       | Gene                    | Region     |
|----------|--------------|------|-------|------|-------|-------------------------|------------|
|          |              | base | depth | base | depth |                         |            |
| 99793    | C            | C    | \     | T    | 439   | <i>alr0094</i>          | ORF        |
| 136013   | T            | T    | \     | C    | 383   | <i>alr0132, all0131</i> | Intergenic |
| 141747   | A            | A    | \     | G    | 414   | <i>asl0137, all0138</i> | Intergenic |
| 165432   | A            | A    | \     | G    | 427   | <i>all0160</i>          | ORF        |
| 172755   | T            | T    | \     | C    | 295   | <i>all0167</i>          | ORF        |
| 176465   | G            | A    | 414   | G    | \     | <i>all0168</i>          | ORF        |
| 228394   | T            | C    | 398   | C    | 375   | <i>all0211</i>          | ORF        |
| 240374   | A            | G    | 439   | G    | 449   | <i>alr0223</i>          | ORF        |
| 254220   | A            | G    | 309   | A    | \     | <i>alr0236, alr0237</i> | Intergenic |
| 335391   | T            | T    | \     | C    | 383   | <i>alr0295, all0293</i> | Intergenic |
| 367421   | A            | G    | 498   | A    | \     | <i>all0323</i>          | ORF        |
| 388027   | C            | T    | 474   | C    | \     | <i>alr0336</i>          | ORF        |
| 411083   | A            | G    | 491   | G    | 473   | <i>all0355</i>          | ORF        |
| 461600   | A            | A    | \     | G    | 430   | <i>all0394</i>          | ORF        |
| 635525   | A            | A    | \     | G    | 467   | <i>alr0543, all0542</i> | Intergenic |
| 663464   | A            | G    | 522   | G    | 345   | <i>alr0568</i>          | ORF        |
| 676298   | G            | G    | \     | T    | 337   | <i>asr0581, alr0582</i> | Intergenic |
| 703818   | C            | C    | \     | T    | 393   | <i>all0606</i>          | ORF        |
| 791750   | T            | C    | 478   | T    | \     | <i>all0684</i>          | ORF        |
| 804565   | A            | G    | 504   | A    | \     | <i>asr0697</i>          | ORF        |
| 838235   | G            | G    | \     | A    | 371   | <i>alr0719</i>          | ORF        |
| 850685   | T            | T    | \     | C    | 421   | <i>all0729</i>          | ORF        |
| 873358   | T            | C    | 568   | T    | \     | <i>alr0751, alr0752</i> | Intergenic |
| 964001   | G            | G    | \     | A    | 427   | <i>alr0838</i>          | ORF        |
| 965275   | T            | C    | 461   | C    | 454   | <i>alr0840, all0839</i> | Intergenic |
| 1105390  | C            | T    | 524   | C    | \     | <i>alr0950, alr0951</i> | Intergenic |

|         |   |     |        |   |     |                         |            |
|---------|---|-----|--------|---|-----|-------------------------|------------|
| 1164680 | C | C   | \      | T | 299 | <i>all0993</i>          | ORF        |
| 1181589 | T | C   | 441    | C | 389 | <i>all1011</i>          | ORF        |
| 1197843 | T | C   | 477    | C | 404 | <i>all1027</i>          | ORF        |
| 1213151 | T | T   | \      | C | 43  | <i>alr1042, alr1041</i> | Intergenic |
| 1218823 | C | T/C | 355/89 | C | \   | <i>all1047</i>          | ORF        |
| 1233544 | G | G   | \      | A | 462 | <i>all1058</i>          | ORF        |
| 1234860 | A | G   | 472    | A | \   | <i>all1059</i>          | ORF        |
| 1260414 | A | G   | 480    | G | 416 | <i>all1076</i>          | ORF        |
| 1276768 | A | G   | 535    | G | 474 | <i>all1089</i>          | ORF        |
| 1291183 | A | G   | 409    | G | 421 | <i>all1101</i>          | ORF        |
| 1297308 | C | C   | \      | T | 439 | <i>alr1108</i>          | ORF        |
| 1297479 | A | G   | 431    | G | 373 | <i>alr1108</i>          | ORF        |
| 1313571 | T | T   | \      | C | 416 | <i>alr1121</i>          | ORF        |
| 1326135 | C | T   | 468    | C | \   | <i>alr1128</i>          | ORF        |
| 1384940 | G | G   | \      | A | 414 | <i>all1177</i>          | ORF        |
| 1425785 | T | T   | \      | C | 418 | <i>all1210</i>          | ORF        |
| 1449194 | A | G   | 462    | G | 432 | <i>all1227</i>          | ORF        |
| 1467026 | T | C   | 548    | C | 446 | <i>alr1236</i>          | ORF        |
| 1469539 | T | T   | \      | C | 491 | <i>all1237, alr1238</i> | Intergenic |
| 1473304 | A | G   | 449    | A | \   | <i>alr1240</i>          | ORF        |
| 1503377 | A | G   | 532    | G | 389 | <i>alr1266</i>          | ORF        |
| 1511804 | G | G   | \      | A | 425 | <i>all1272</i>          | ORF        |
| 1524963 | G | A   | 497    | A | 407 | <i>all1281</i>          | ORF        |
| 1526058 | T | C   | 479    | C | 436 | <i>alr1282</i>          | ORF        |
| 1589551 | G | G   | \      | A | 392 | <i>all1338</i>          | ORF        |
| 1603350 | G | A   | 378    | A | 429 | <i>alr1348</i>          | ORF        |
| 1611061 | A | G   | 492    | A | \   | <i>all1357</i>          | ORF        |
| 1611129 | A | G   | 480    | A | \   | <i>all1357</i>          | ORF        |
| 1689791 | A | G/A | 446/93 | A | \   | <i>all1427</i>          | ORF        |



|         |   |   |     |   |     |                         |            |
|---------|---|---|-----|---|-----|-------------------------|------------|
| 1720294 | G | G | \   | A | 379 | <i>all1463, alr1462</i> | Intergenic |
| 1740294 | G | A | 405 | G | \   | <i>all1477</i>          | ORF        |
| 1740843 | T | C | 455 | C | 401 | <i>all1478</i>          | ORF        |
| 1771480 | A | A | \   | C | 412 | <i>all1509</i>          | ORF        |
| 1810252 | T | T | \   | C | 443 | <i>all1549</i>          | ORF        |
| 1816020 | T | C | 433 | T | \   | <i>all1553</i>          | ORF        |
| 1829742 | G | T | 515 | G | \   | <i>alr1564</i>          | ORF        |
| 1839174 | C | T | 447 | T | 386 | <i>all1574, alr1575</i> | Intergenic |
| 1895931 | G | A | 468 | A | 386 | <i>alr1614</i>          | ORF        |
| 1897575 | G | A | 500 | A | 379 | <i>alr1614</i>          | ORF        |
| 1907745 | A | A | \   | G | 370 | <i>alr1619</i>          | ORF        |
| 1908542 | T | C | 460 | T | \   | <i>alr1620</i>          | ORF        |
| 1939174 | C | T | 488 | C | \   | <i>all1639</i>          | ORF        |
| 1968465 | T | T | \   | C | 342 | <i>all1649</i>          | ORF        |
| 1981387 | G | A | 473 | A | 464 | <i>alr1659</i>          | ORF        |
| 1992410 | A | A | \   | G | 389 | <i>alr1669</i>          | ORF        |
| 2008739 | G | A | 480 | A | 432 | <i>all1683</i>          | ORF        |
| 2020785 | G | A | 528 | A | 499 | <i>all1691, all1692</i> | Intergenic |
| 2027656 | G | A | 500 | G | \   | <i>all1695</i>          | ORF        |
| 2028469 | C | T | 486 | C | \   | <i>all1695</i>          | ORF        |
| 2095482 | A | G | 474 | A | \   | <i>alr1742</i>          | ORF        |
| 2103674 | A | A | \   | G | 446 | <i>asl1749</i>          | ORF        |
| 2199111 | T | T | \   | C | 455 | <i>alr1833, alr1834</i> | Intergenic |
| 2203380 | C | T | 488 | T | 456 | <i>asl1839</i>          | ORF        |
| 2212421 | C | C | \   | T | 389 | <i>all1849</i>          | ORF        |
| 2232920 | C | T | 465 | C | \   | <i>alr1870</i>          | ORF        |
| 2310473 | A | G | 240 | A | \   | <i>alr1926, alr1927</i> | Intergenic |
| 2348508 | A | T | 433 | A | \   | <i>alr1965, alr1966</i> | Intergenic |
| 2359208 | T | C | 420 | C | 410 | <i>all1974</i>          | ORF        |

|         |   |     |        |   |     |                         |            |
|---------|---|-----|--------|---|-----|-------------------------|------------|
| 2386615 | G | G   | \      | A | 421 | <i>all1990</i>          | ORF        |
| 2466963 | C | T   | 458    | T | 360 | <i>all2058</i>          | ORF        |
| 2479725 | T | G   | 460    | G | 440 | <i>alr2073, all2072</i> | Intergenic |
| 2498543 | C | C   | \      | A | 244 | <i>alr2090</i>          | ORF        |
| 2498548 | T | T   | \      | C | 248 | <i>alr2090</i>          | ORF        |
| 2556356 | T | T   | \      | C | 463 | <i>alr2130</i>          | ORF        |
| 2571912 | A | A   | \      | G | 429 | <i>alr2143</i>          | ORF        |
| 2580643 | G | G   | \      | A | 385 | <i>all2149</i>          | ORF        |
| 2665829 | T | C   | 523    | C | 407 | <i>all2221, all2222</i> | Intergenic |
| 2677570 | G | A   | 534    | G | \   | <i>alr2233</i>          | ORF        |
| 2756402 | A | G   | 462    | G | 355 | <i>all2287</i>          | ORF        |
| 2832449 | G | G   | \      | A | 401 | <i>alr2350, all2349</i> | Intergenic |
| 2834963 | A | A   | \      | G | 435 | <i>all2352</i>          | ORF        |
| 2843120 | C | T   | 465    | C | \   | <i>alr2361</i>          | ORF        |
| 2856383 | T | C   | 462    | C | 358 | <i>alr2373</i>          | ORF        |
| 2871033 | C | C   | \      | T | 430 | <i>all2384</i>          | ORF        |
| 2902538 | G | G   | \      | A | 431 | <i>alr2418</i>          | ORF        |
| 2927969 | T | T   | \      | C | 395 | <i>alr2434</i>          | ORF        |
| 2966029 | C | C   | \      | T | 428 | <i>alr2467</i>          | ORF        |
| 2979695 | A | A   | \      | G | 436 | <i>alr2481</i>          | ORF        |
| 3067783 | A | G/A | 370/93 | A | \   | <i>all2567</i>          | ORF        |
| 3150434 | G | A   | 477    | A | 439 | <i>all2635</i>          | ORF        |
| 3164466 | T | C   | 414    | C | 426 | <i>all2643</i>          | ORF        |
| 3214501 | A | G   | 545    | G | 464 | <i>all2655</i>          | ORF        |
| 3244445 | A | G   | 406    | G | 424 | <i>all2675, all2676</i> | Intergenic |
| 3280388 | A | G   | 447    | G | 404 | <i>all2688</i>          | ORF        |
| 3280989 | A | A   | \      | G | 422 | <i>all2689</i>          | ORF        |
| 3292733 | A | A   | \      | G | 408 | <i>all2699</i>          | ORF        |
| 3299861 | A | G   | 436    | G | 366 | <i>all2706</i>          | ORF        |

|         |    |     |         |   |     |                                         |            |
|---------|----|-----|---------|---|-----|-----------------------------------------|------------|
| 3314107 | C  | T   | 494     | T | 434 | <i>alr2719, alr2718</i>                 | Intergenic |
| 3321812 | C  | T   | 448     | T | 407 | <i>alr2725</i>                          | ORF        |
| 3376560 | T  | C   | 510     | C | 455 | <i>asl2779, alr2780</i>                 | Intergenic |
| 3384352 | A  | G   | 485     | G | 411 | <i>alr2784, alr2785</i>                 | Intergenic |
| 3385448 | C  | T   | 491     | T | 374 | <i>alr2785</i>                          | ORF        |
| 3388341 | T  | A   | 329     | A | 356 | <i>all2787</i>                          | ORF        |
| 3404883 | C  | T   | 469     | T | 435 | <i>alr2800</i>                          | ORF        |
| 3439866 | T  | C   | 479     | C | 445 | <i>alr2824</i>                          | ORF        |
| 3449008 | C  | C   | \       | T | 403 | <i>alr2832</i><br>(glycosyltransferase) | ORF        |
| 3461181 | G  | G   | \       | A | 433 | <i>alr2840</i><br>(glycosyltransferase) | ORF        |
| 3461281 | TT | C/T | 413/103 | T | \   | <i>alr2840</i>                          | ORF        |
| 3522353 | C  | T   | 487     | T | 314 | <i>alr2884, all2883</i>                 | Intergenic |
| 3529532 | A  | G   | 444     | G | 337 | <i>all2891</i>                          | ORF        |
| 3553554 | T  | T   | \       | C | 392 | <i>all2911</i>                          | ORF        |
| 3561805 | T  | T   | \       | C | 437 | <i>alr2920, alr2921</i>                 | Intergenic |
| 3665879 | T  | C   | 439     | C | 337 | <i>asl3025</i>                          | ORF        |
| 3678170 | A  | G   | 444     | A | \   | <i>alr3037</i>                          | ORF        |
| 3678824 | A  | G   | 466     | G | 436 | <i>alr3037</i>                          | ORF        |
| 3682278 | C  | T   | 407     | T | 439 | <i>all3040, all3041</i>                 | Intergenic |
| 3707449 | A  | G   | 424     | A | \   | <i>alr3059</i>                          | ORF        |
| 3717999 | T  | T   | \       | C | 407 | <i>alr3068</i>                          | ORF        |
| 3902869 | T  | C   | 476     | T | \   | <i>all3232</i>                          | ORF        |
| 3997485 | T  | C/T | 387/50  | T | \   | <i>alr3311</i>                          | ORF        |
| 4004306 | C  | T   | 434     | C | \   | <i>all3314</i>                          | ORF        |
| 4054871 | T  | T   | \       | C | 442 | <i>alr3351</i>                          | ORF        |
| 4070477 | G  | G   | \       | A | 340 | <i>alr3363</i>                          | ORF        |
| 4071943 | T  | T   | \       | C | 397 | <i>alr3364</i>                          | ORF        |

|         |   |     |         |   |     |                         |            |
|---------|---|-----|---------|---|-----|-------------------------|------------|
| 4074557 | C | T   | 455     | T | 320 | <i>alr3366, all3367</i> | Intergenic |
| 4085038 | C | T   | 449     | T | 463 | <i>all3375</i>          | ORF        |
| 4096661 | T | C   | 469     | C | 375 | <i>alr3385</i>          | ORF        |
| 4105348 | A | A   | \       | G | 366 | <i>alr3397</i>          | ORF        |
| 4206630 | T | T   | \       | C | 416 | <i>alr3491</i>          | ORF        |
| 4211631 | G | A   | 490     | A | 365 | <i>alr3497</i>          | ORF        |
| 4219140 | A | G   | 486     | A | \   | <i>all3503</i>          | ORF        |
| 4283858 | A | G   | 453     | A | \   | <i>alr3553, alr3554</i> | Intergenic |
| 4329437 | G | A   | 479     | A | 431 | <i>alr3584</i>          | ORF        |
| 4372460 | A | C   | 71      | C | 472 | <i>alr3620</i>          | ORF        |
| 4383161 | C | T/C | 517/59  | C | \   | <i>all3632</i>          | ORF        |
| 4429266 | A | G   | 294     | A | \   | <i>alr3672, all3673</i> | Intergenic |
| 4524010 | G | G   | \       | A | 455 | <i>all3746</i>          | ORF        |
| 4542759 | A | A   | \       | G | 388 | <i>alr3761</i>          | ORF        |
| 4580258 | C | T   | 452     | C | \   | <i>alr3789</i>          | ORF        |
| 4591842 | G | A   | 500     | G | \   | <i>alr3799, alr3800</i> | Intergenic |
| 4609347 | G | A   | 409     | G | \   | <i>alr3811, alr3812</i> | Intergenic |
| 4624534 | A | A   | \       | G | 395 | <i>alr3825</i>          | ORF        |
| 4633553 | G | A   | 460     | A | 417 | <i>alr3832, alr3833</i> | Intergenic |
| 4658414 | G | A   | 515     | G | \   | <i>all3859</i>          | ORF        |
| 4667926 | A | A   | \       | G | 460 | <i>alr3867</i>          | ORF        |
| 4692046 | G | A   | 455     | G | \   | <i>all3891</i>          | ORF        |
| 4707809 | A | G   | 522     | A | \   | <i>all3903, alr3904</i> | Intergenic |
| 4708391 | A | A   | \       | G | 426 | <i>alr3904</i>          | ORF        |
| 4741099 | G | A   | 484     | A | 387 | <i>all3927</i>          | ORF        |
| 4834014 | G | A/G | 437/131 | G | \   | <i>asl4014</i>          | ORF        |
| 4835685 | C | T   | 490     | C | \   | <i>alr4016</i>          | ORF        |
| 4853972 | T | C   | 480     | C | 418 | <i>alr4028</i>          | ORF        |
| 4862032 | C | T   | 488     | T | 430 | <i>all4035</i>          | ORF        |

|         |   |     |        |   |     |                         |            |
|---------|---|-----|--------|---|-----|-------------------------|------------|
| 4930827 | T | T   | \      | C | 470 | <i>all4092</i>          | ORF        |
| 4942838 | C | C   | \      | T | 396 | <i>all4102</i>          | ORF        |
| 4960654 | T | T   | \      | C | 418 | <i>all4117</i>          | ORF        |
| 4987803 | T | C   | 453    | T | \   | <i>alr4141, all4142</i> | Intergenic |
| 5012714 | C | T   | 526    | T | 473 | <i>alr4166</i>          | ORF        |
| 5031775 | C | C   | \      | T | 389 | <i>all4182</i>          | ORF        |
| 5036789 | T | C   | 478    | C | 420 | <i>all4188</i>          | ORF        |
| 5053532 | T | T   | \      | C | 432 | <i>alr4216</i>          | ORF        |
| 5054846 | C | A   | 488    | C | \   | <i>all4218</i>          | ORF        |
| 5069810 | T | C   | 417    | C | 434 | <i>all4233</i>          | ORF        |
| 5072713 | A | G   | 513    | G | 361 | <i>all4236</i>          | ORF        |
| 5093978 | T | T   | \      | C | 397 | <i>alr4247</i>          | ORF        |
| 5096718 | A | G   | 452    | G | 378 | <i>all4248</i>          | ORF        |
| 5118388 | T | C   | 494    | C | 486 | <i>alr4268</i>          | ORF        |
| 5123906 | T | C   | 487    | T | \   | <i>alr4273</i>          | ORF        |
| 5128378 | T | C   | 473    | C | 467 | <i>alr4275</i>          | ORF        |
| 5130579 | T | T   | \      | C | 355 | <i>alr4277</i>          | ORF        |
| 5148689 | A | G/A | 376/85 | A | \   | <i>all4294</i>          | ORF        |
| 5220452 | C | T   | 484    | C | \   | <i>all4358</i>          | ORF        |
| 5268442 | G | A   | 461    | G | \   | <i>alr4394</i>          | ORF        |
| 5277885 | C | T   | 511    | C | \   | <i>all4402</i>          | ORF        |
| 5295867 | G | T   | 489    | G | \   | <i>alr4417</i>          | ORF        |
| 5299799 | G | A   | 541    | A | 397 | <i>asr4421</i>          | ORF        |
| 5366378 | A | C   | 466    | A | \   | <i>all4480</i>          | ORF        |
| 5376257 | T | C   | 532    | T | \   | <i>alr4489</i>          | ORF        |
| 5451412 | A | A   | \      | G | 457 | <i>all4556</i>          | ORF        |
| 5472869 | A | G   | 174    | A | \   | <i>all4578</i>          | ORF        |
| 5472870 | A | C   | 174    | A | \   | <i>all4578</i>          | ORF        |
| 5501951 | A | G   | 458    | G | 450 | <i>alr4604</i>          | ORF        |

|         |   |   |     |   |     |                         |            |
|---------|---|---|-----|---|-----|-------------------------|------------|
| 5542778 | A | G | 462 | G | 423 | <i>all4639</i>          | ORF        |
| 5596861 | C | T | 482 | T | 462 | <i>all4690</i>          | ORF        |
| 5636415 | T | T | \   | C | 344 | <i>all4729</i>          | ORF        |
| 5638397 | A | G | 465 | G | 391 | <i>all4731</i>          | ORF        |
| 5646409 | A | G | 464 | G | 437 | <i>alr4734, all4735</i> | Intergenic |
| 5656553 | A | G | 493 | G | 461 | <i>asl4743</i>          | ORF        |
| 5677447 | G | G | \   | T | 469 | <i>all4763</i>          | ORF        |
| 5718687 | A | G | 427 | G | 387 | <i>all4799</i>          | ORF        |
|         |   |   |     |   |     | <i>alr4811, alr4812</i> |            |
|         |   |   |     |   |     | (heterocyst             |            |
| 5730046 | C | T | 487 | T | 442 | differentiation related | Intergenic |
|         |   |   |     |   |     | protein PatN)           |            |
| 5746803 | C | C | \   | T | 420 | <i>all4828</i>          | ORF        |
| 5808428 | A | G | 470 | G | 437 | <i>alr4877</i>          | ORF        |
| 5873706 | C | A | 526 | C | \   | <i>all4925</i>          | ORF        |
| 5895688 | C | T | 484 | C | \   | <i>alr4938, alr4939</i> | Intergenic |
| 5930524 | C | C | \   | T | 399 | <i>all4968</i>          | ORF        |
| 6040371 | T | T | \   | C | 353 | <i>alr5068</i>          | ORF        |
| 6053276 | G | G | \   | A | 398 | <i>all5082, alr5081</i> | Intergenic |
| 6053727 | T | T | \   | C | 381 | <i>all5082, alr5081</i> | Intergenic |
| 6077149 | C | T | 509 | C | \   | <i>all5100, alr5101</i> | Intergenic |
| 6078691 | T | T | \   | C | 406 | <i>alr5101</i>          | ORF        |
| 6085980 | G | A | 491 | G | \   | <i>all5105</i>          | ORF        |
| 6087384 | G | T | 443 | G | \   | <i>all5106</i>          | ORF        |
| 6103380 | G | G | \   | A | 435 | <i>all5113</i>          | ORF        |
| 6150516 | C | T | 478 | C | \   | <i>all5153</i>          | ORF        |
| 6239409 | G | A | 531 | G | \   | <i>alr5225</i>          | ORF        |
| 6263798 | T | C | 438 | C | 423 | <i>alr5249</i>          | ORF        |
| 6275081 | G | G | \   | A | 377 | <i>alr5259</i>          | ORF        |

|         |   |     |        |   |     |                                     |     |
|---------|---|-----|--------|---|-----|-------------------------------------|-----|
| 6276832 | G | A   | 527    | A | 367 | <i>asr5261</i>                      | ORF |
| 6352567 | C | T/C | 441/61 | C | \   | <i>all5323</i>                      | ORF |
| 6365449 | G | A/G | 426/92 | G | \   | <i>alr5331</i>                      | ORF |
| 6375751 | C | T   | 465    | C | \   | <i>all5342</i>                      | ORF |
|         |   |     |        |   |     | <i>alr5351</i>                      |     |
| 6386500 | T | T   | \      | C | 448 | (heterocyst glycolipid<br>synthase) | ORF |
| 6387506 | A | G   | 482    | G | 481 | <i>alr5351</i>                      | ORF |

---

\*Bases boxed were confirmed with PCR and traditional sequencing.

**Table S2 InDels in chromosome (chr) and plasmids of *Anabaena* sp. PCC 7120 substrains**

**IHB and HAU\***

| Chr or<br>plasmid | Position   | Type      | Ref.<br>base | IHB  |       | HAU  |       | Gene                               | Region     |
|-------------------|------------|-----------|--------------|------|-------|------|-------|------------------------------------|------------|
|                   |            |           |              | base | depth | base | depth |                                    |            |
| chr               | 14661      | Deletion  | A            | A    | \     | -    | 1784  | <i>alr0018</i>                     | ORF        |
| chr               | 36912-3    | Insertion | □            | -    | \     | □    | 461   | <i>alr0035, all0036</i>            | Intergenic |
| chr               | 207447     | Deletion  | T            | T    | \     | -    | 1731  | <i>alr0191, all0192</i>            | Intergenic |
| chr               | 414839-40  | Insertion | -            | A    | 599   | A    | 1999  | <i>alr0357</i>                     | ORF        |
| chr               | 554951-2   | Insertion | -            | T    | 459   | -    | \     | <i>all0466</i>                     | ORF        |
| chr               | 589912-3   | Insertion | -            | -    | \     | T    | 1166  | <i>all0493</i>                     | ORF        |
| chr               | 610519     | Deletion  | □            | □    | 384   | □    | 1246  | <i>trnH-GUG,</i><br><i>alr0518</i> | Intergenic |
| chr               | 771861     | Deletion  | T            | -    | 541   | -    | 1664  | <i>all0665, all0665</i>            | ORF        |
| chr               | 809568-9   | Insertion | -            | -    | \     | A    | 1572  | <i>all0703, alr0704</i>            | Intergenic |
| chr               | 902956-7   | Insertion | -            | T    | 485   | -    | \     | <i>asl0779</i>                     | ORF        |
| chr               | 940479     | Deletion  | T            | -    | 526   | -    | 1451  | <i>asl0814</i>                     | ORF        |
| chr               | 972329     | Deletion  | □            | □    | 462   | T    | \     | <i>all0848</i>                     | ORF        |
| chr               | 1058848-9  | Insertion | -            | -    | \     | T    | 2052  | <i>all0914</i>                     | ORF        |
| chr               | 1115022    | Deletion  | T            | T    | \     | -    | 2060  | <i>all0959</i>                     | ORF        |
| chr               | 1333941-2  | Insertion | -            | -    | \     | GAA  | 1170  | <i>alr1133</i>                     | ORF        |
| chr               | 1393819-20 | Insertion | -            | -    | \     | T    | 1457  | <i>alr1184</i>                     | ORF        |
| chr               | 1545050    | Deletion  | C            | C    | \     | -    | 1217  | <i>all1304</i>                     | ORF        |
| chr               | 1843512    | Deletion  | A            | -    | 601   | A    | \     | <i>alr1575, alr1576</i>            | Intergenic |
| chr               | 1939746-7  | Insertion | -            | T    | 507   | -    | \     | <i>all1640</i>                     | ORF        |
| chr               | 1951712-3  | Insertion | -            | T    | 536   | T    | 1185  | <i>all1646</i>                     | ORF        |
| chr               | 1993136    | Deletion  | A            | -    | 575   | A    | \     | <i>all1670, asl1671</i>            | Intergenic |
| chr               | 2086016-7  | Insertion | □            | □    | 475   | -    | \     | <i>alr1733, asr1734</i>            | Intergenic |
| chr               | 2124780    | Deletion  | □            | T    | \     | □    | 2006  | <i>all1769</i>                     | ORF        |
| chr               | 2271317-8  | Insertion | -            | T    | 471   | -    | \     | <i>alr1901</i>                     | ORF        |



|     |            |           |    |    |     |    |      |                         |            |
|-----|------------|-----------|----|----|-----|----|------|-------------------------|------------|
| chr | 2326295-6  | Insertion | -  | A  | 498 | A  | 1004 | <i>alr1942, alr1942</i> | ORF        |
| chr | 2640110    | Deletion  | T  | -  | 281 | -  | 2197 | <i>asl2199, all2200</i> | Intergenic |
| chr | 2685079    | Deletion  | T  | T  | \   | -  | 1839 | <i>all2237</i>          | ORF        |
| chr | 2720514    | Deletion  | T  | T  | \   | -  | 1667 | <i>all2260, alr2261</i> | Intergenic |
| chr | 2724275-6  | Insertion | -  | -  | \   | T  | 1655 | <i>alr2264</i>          | ORF        |
| chr | 2787260    | Deletion  | A  | T  | 447 | T  | 1356 | <i>alr2312</i>          | ORF        |
| chr | 2836658    | Deletion  | C  | -  | 546 | C  | \    | <i>asl2353, asl2354</i> | Intergenic |
| chr | 2848795-6  | Insertion | -  | -  | \   | G  | 1098 | <i>all2364</i>          | ORF        |
| chr | 2852744-5  | Insertion | -  | -  | \   | A  | 1827 | <i>asr2369</i>          | ORF        |
| chr | 3131501    | Deletion  | T  | -  | 559 | -  | 1919 | <i>all2622, all2623</i> | Intergenic |
| chr | 3145914    | Deletion  | A  | A  | \   | -  | 1853 | <i>asl2632</i>          | ORF        |
| chr | 3205733-4  | Insertion | -  | -  | \   | A  | 1455 | <i>all2651, all2652</i> | Intergenic |
| chr | 3293129-30 | Insertion | -  | A  | 564 | -  | \    | <i>all2699, all2700</i> | Intergenic |
| chr | 3487835-6  | Insertion | -  | A  | 487 | A  | 1710 | <i>alr2862</i>          | ORF        |
| chr | 3517885    | Insertion | T  | G  | 232 | -  | \    | <i>alr2882, all2883</i> | Intergenic |
| chr | 3594745    | Deletion  | T  | T  | \   | -  | 1435 | <i>all2952</i>          | ORF        |
| chr | 3810307    | Deletion  | G  | -  | 447 | -  | 1052 | <i>alr3146</i>          | ORF        |
| chr | 3909868    | Deletion  | A  | -  | 547 | A  | \    | <i>all3237, alr3238</i> | Intergenic |
| chr | 3925317-8  | Insertion | -  | A  | 556 | A  | 1413 | <i>alr3248</i>          | ORF        |
| chr | 3942866    | Deletion  | T  | T  | \   | -  | 1696 | <i>all3270, all3271</i> | Intergenic |
| chr | 3990028-9  | Insertion | -  | T  | 500 | T  | 1511 | <i>all3306, alr3307</i> | Intergenic |
| chr | 4070842-3  | Insertion | -  | G  | 545 | G  | 1782 | <i>alr3363, alr3364</i> | Intergenic |
| chr | 4203130    | Deletion  | T  | -  | 497 | T  | \    | <i>all3487, all3488</i> | Intergenic |
| chr | 4247463-4  | Insertion | -  | -  | \   | C  | 48   | <i>alr3525</i>          | ORF        |
| chr | 4336583-4  | Insertion | -  | A  | 483 | -  | \    | <i>alr3588</i>          | ORF        |
| chr | 4723840    | Deletion  | GA | T  | 521 | GA | \    | <i>alr3917</i>          | ORF        |
| chr | 4776489    | Deletion  | T  | -  | 443 | -  | 1305 | <i>alr3956, alr3957</i> | Intergenic |
| chr | 5022643    | Deletion  | A  | A  | \   | -  | 1295 | <i>alr4174</i>          | ORF        |
| chr | 5063682    | Deletion  | AG | AG | \   | T  | 2154 | <i>alr4226</i>          | ORF        |

|       |           |           |   |    |      |    |      |                         |            |
|-------|-----------|-----------|---|----|------|----|------|-------------------------|------------|
| chr   | 5087164   | Deletion  | A | A  | \    | -  | 1573 | <i>all4242</i>          | ORF        |
| chr   | 5106430-1 | Insertion | - | G  | 459  | -  | \    | <i>all4257</i>          | ORF        |
| chr   | 5146433   | Deletion  | T | -  | 460  | -  | 1817 | <i>all4292</i>          | ORF        |
| chr   | 5651270-1 | Insertion | - | A  | 535  | A  | 1842 | <i>alr4739</i>          | ORF        |
| chr   | 5746722-3 | Insertion | □ | □G | 503  | □G | 1760 | <i>all4828</i>          | ORF        |
| chr   | 5808188-9 | Insertion | - | -  | \    | A  | 1811 | <i>alr4877</i>          | ORF        |
| chr   | 5945191-2 | Insertion | - | -  | \    | A  | 39   | <i>rrn23Sd</i>          | rrn23Sd    |
| chr   | 5989467   | Deletion  | T | -  | 537  | -  | 1558 | <i>all5017</i>          | ORF        |
| chr   | 6035648   | Deletion  | A | -  | 474  | -  | 1500 | <i>all5062, all5063</i> | Intergenic |
| chr   | 6098981   | Deletion  | C | C  | \    | -  | 1154 | <i>all5111</i>          | ORF        |
| chr   | 6130243   | Deletion  | T | -  | 513  | -  | 1942 | <i>all5133, alr5134</i> | Intergenic |
| chr   | 6390098-9 | Insertion | - | A  | 400  | -  | \    | <i>alr5351</i>          | ORF        |
| alpha | 29215-6   | Insertion | - | C  | 1958 | -  | \    | <i>all7030</i>          | ORF        |
| alpha | 62179-80  | Insertion | - | -  | \    | TT | 8035 | <i>all7072, alr7073</i> | Intergenic |
| alpha | 132994    | Deletion  | A | A  | \    | -  | 9566 | <i>all7130</i>          | ORF        |
| alpha | 160054    | Deletion  | C | -  | 577  | C  | \    | <i>all7158, asl7159</i> | Intergenic |
| alpha | 160612-3  | Insertion | - | -  | \    | C  | 6095 | <i>all7160</i>          | ORF        |
| alpha | 272804-5  | Insertion | - | A  | 2169 | -  | \    | <i>alr7254, all7255</i> | Intergenic |
| alpha | 303864    | Deletion  | A | -  | 2312 | A  | \    | <i>alr7295, asl7296</i> | Intergenic |
| alpha | 365507    | Deletion  | A | A  | \    | -  | 7279 | <i>all7332</i>          | ORF        |
| alpha | 386284-5  | Insertion | □ | □T | 2466 | □T | 9286 | <i>asl7356</i>          | ORF        |
| alpha | 392645    | Deletion  | T | -  | 2335 | -  | 6603 | <i>all7367</i>          | ORF        |
| alpha | 398598-9  | Insertion | - | -  | \    | T  | 4243 | <i>all7376, all7377</i> | Intergenic |
| alpha | 402532    | Deletion  | A | A  | \    | -  | 7873 | <i>all7379</i>          | ORF        |
| beta  | 58391     | Deletion  | G | -  | 542  | G  | \    | <i>all7564</i>          | ORF        |
| gamma | 72469-70  | Insertion | □ | -  | \    | □C | 355  | <i>all8065, alr8066</i> | Intergenic |
| delta | 9538      | Deletion  | T | -  | 520  | -  | 684  | <i>all8511, asl8512</i> | Intergenic |
| delta | 27841     | Deletion  | A | -  | 416  | -  | 698  | <i>asl8536</i>          | ORF        |

---

\*Bases boxed were confirmed with PCR and traditional sequencing.
